# Supplementary material for: A new safranin based three-component photoinitiating system for high resolution and low shrinkage printed parts via digital light processing
Source: Royal Society of Chemistry journal article supplement (doi:10.1039/c9ra09170j), 2019-01-01
Supplement: c9ra09170j1.pdf [file c9ra09170j1.pdf]

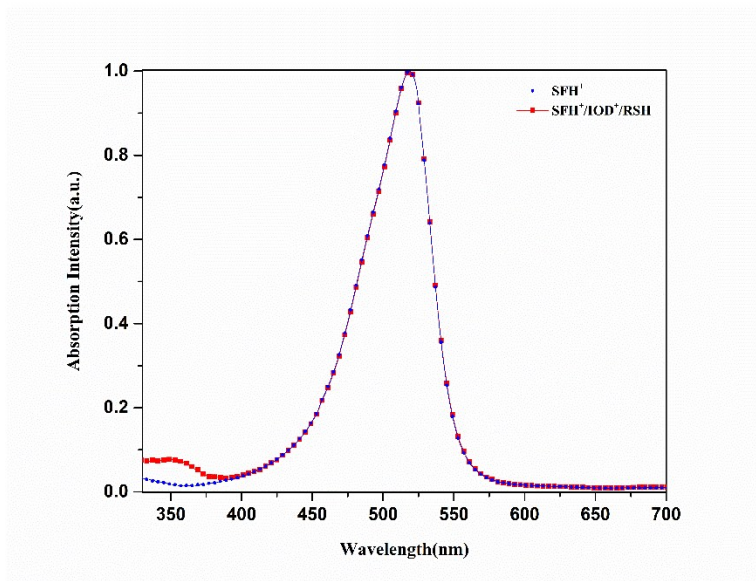

Figure s1. UV-vis spectra of safranin alone and with cointiators

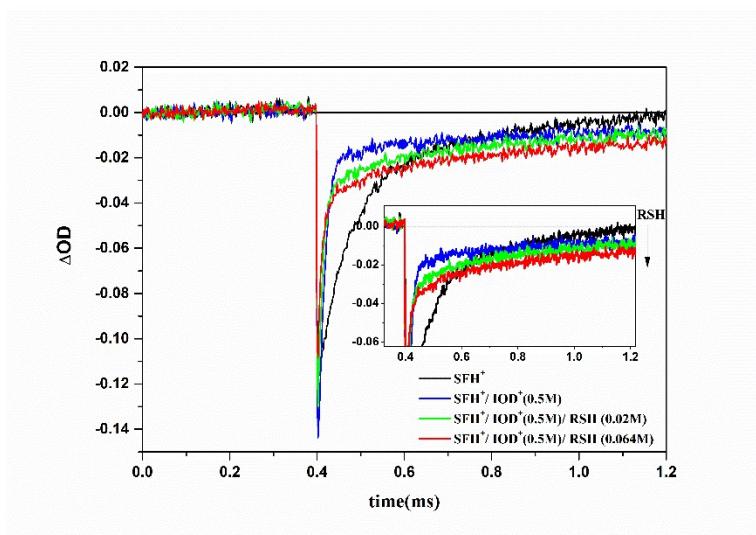

Figure s2. Ground state photobleaching of [SFH<sup>+</sup>] recorded at 520 nm in the presence of IOD<sup>+</sup> at 0.5 M and various concentrations of RSH ( $\lambda_{exc} = 518$  nm, 6-7 mJ/pulse).

Table s1. Photochemical and redox properties of PIS component in acetonitrile.

|                  | $\lambda_{abs}^{max}({}^0\text{SFH}^+)(\text{nm})$ | $\lambda_{abs}^{max}({}^3\text{SFH}^+)(\text{nm})$ | $\varepsilon(\lambda_{abs}^{max})(\text{L}\cdot\text{mol}^{-1}\cdot\text{cm}^{-1})$ | $E_T(\text{eV})$ | $E_{\text{Ox}}(\text{V})$ | $E_{\text{Red}}(\text{V})$ |
|------------------|----------------------------------------------------|----------------------------------------------------|-------------------------------------------------------------------------------------|------------------|---------------------------|----------------------------|
| SFH <sup>+</sup> | 518                                                | 820                                                | 44000                                                                               | 1.83             | 0.86                      | -0.62                      |
| IOD <sup>+</sup> | <375                                               |                                                    |                                                                                     |                  |                           | -0.2                       |
| RSH              | <375                                               |                                                    |                                                                                     |                  | 1.52                      |                            |
